# Supplementary material
Source: publisher site journal article supplement (https://www.dovepress.com/article/217347)
Supplement: Supplementary file 1 [file get_supplementary_file.php]

**Table S1** Primers for RT-qPCR in this study

| Primer Name | Sequence - 5' - 3'     |
|-------------|------------------------|
| GAPDH-F     | GCACCGTCAAGGCTGAGAAC   |
| GAPDH-R     | TGGTGAAGACGCCAGTGGA    |
| E2F1-F      | GCCACTGACTCTGCCACCATAG |
| E2F1-R      | CTGCCCATCCGGGACAAC     |
| CFH -F      | AACTTCTGATCGAAGGTCATCC |
| CFH -R      | TTGGCCCTTGTCATCTTTG    |
| IL1RL1-F    | GCAGAATCATTGGCCTTGTT   |
| IL1RL1-R    | ACTTCTGCGACTGGCATTTT   |
| AIF1L -F    | CGAGCTCAGCAACAGGTTCCA  |
| AIF1L -R    | ACATCAGGTCAATCTCGCCTT  |
| TMOD2-F     | CAACACTCACGTGAAGAAGTTC |
| TMOD2-R     | GTGTCATTTTCTTTCAGTGCCT |
| EVA1C-F     | TGGTATAAACTTCGACCCAAGC |
| EVA1C-R     | GTGGGCTCTAATGTAAGCAAAG |
| CDH1-F      | ACTCGTAACGACGTTGCACCA  |
| CDH1-R      | GGTCAGTATCAGCCGCTTTCAG |
| VEGFA-F     | CCTTGCTGCTCTACCTCCAC   |
| VEGFA-R     | GAAGATGTCCACCAGGGTCTC  |
| CCL2-F      | CAGCCAGATGCAATCAATGCC  |
| CCL2-R      | CGCTACTCTCTCTTCTGG     |

**Abbreviations:** RT-qPCR, real-time quantitative PCR; F, forward primer; R, reverse primer; GAPDH, glyceraldehyde-phosphate dehydrogenase; CFH, complement factor H; IL1RL1, interleukin 1 receptor-like 1; EVA1C, Eva-1 homolog C; TMOD2, tropomodulin 2; AIF1L, allograft inflammatory factor 1 like; CCL2, C-C motif chemokine ligand 2; CDH1, cadherin 1; VEGFA, vascular endothelial growth factor A.
